# Supplementary material for: Optimized albendazole-loaded nanostructured lipid carrier gel: a redefined approach for localized skin cancer treatment
Source: Royal Society of Chemistry journal article supplement (doi:10.1039/d4pm00207e), 2024-01-01
Supplement: d4pm00207e1.pdf [file d4pm00207e1.pdf]

## Results

### Figures

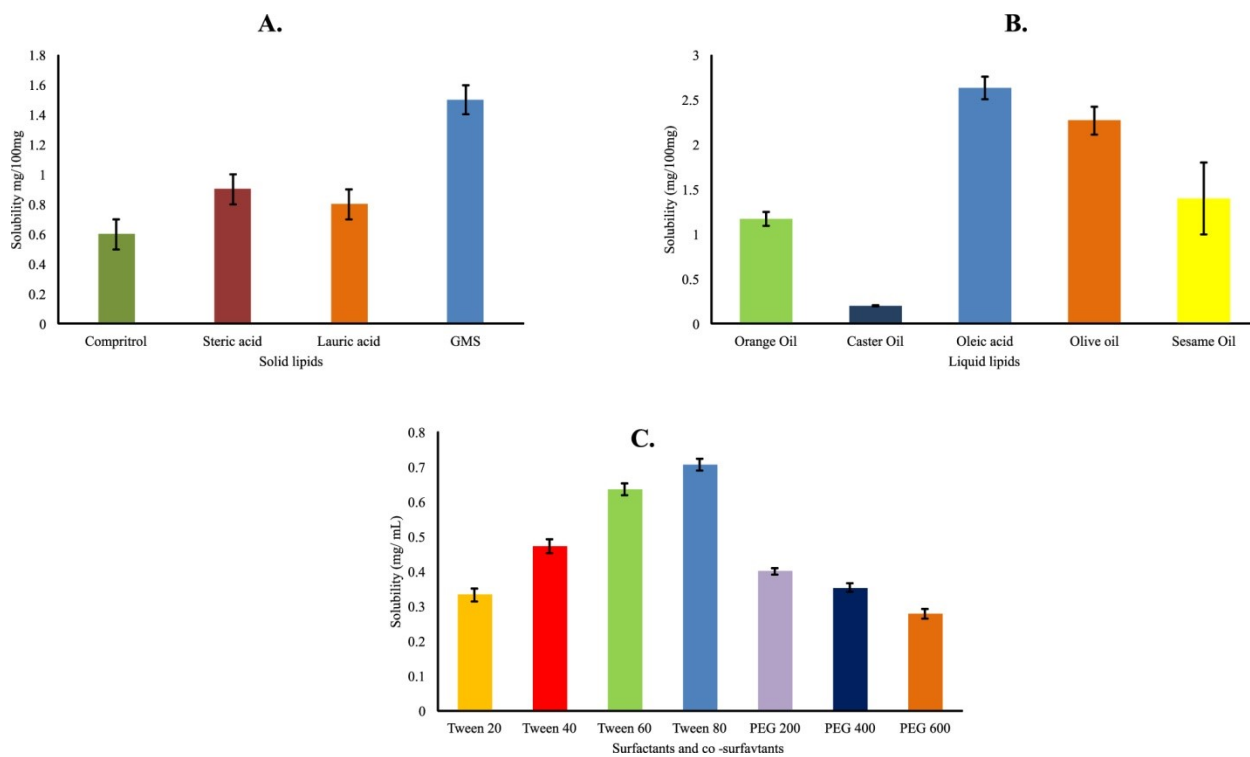

**Fig S1.** Solubility of ABZ in different NLCs components

**A.**

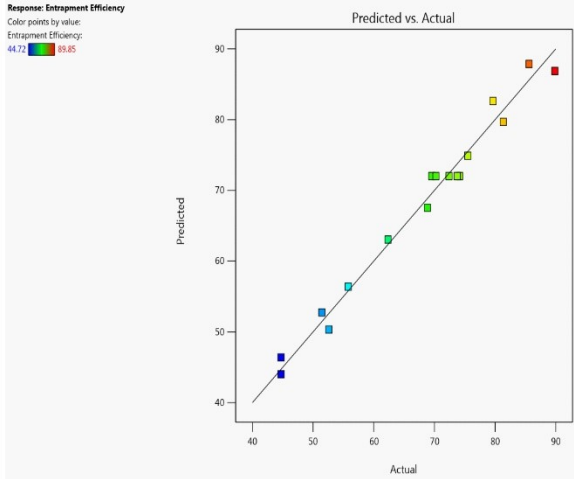

**B.**

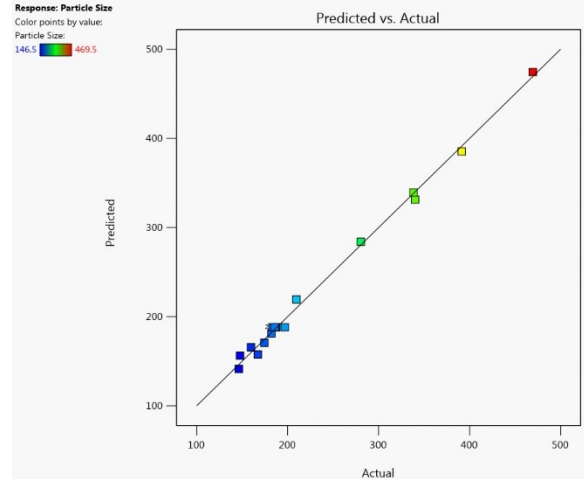

**Fig S2.** Actual vs predicted plot for response **A)**  $Y_1$  and **B)**  $Y_2$

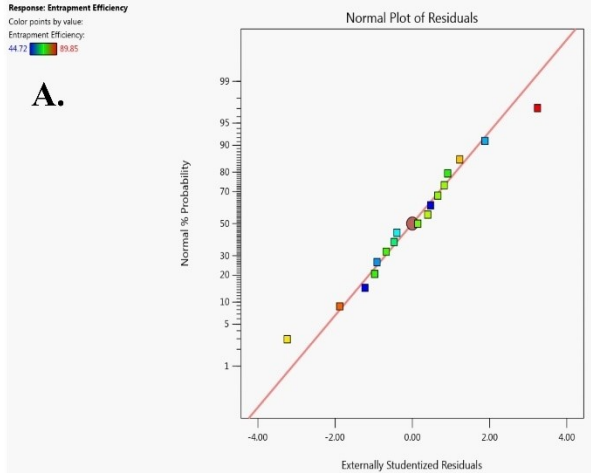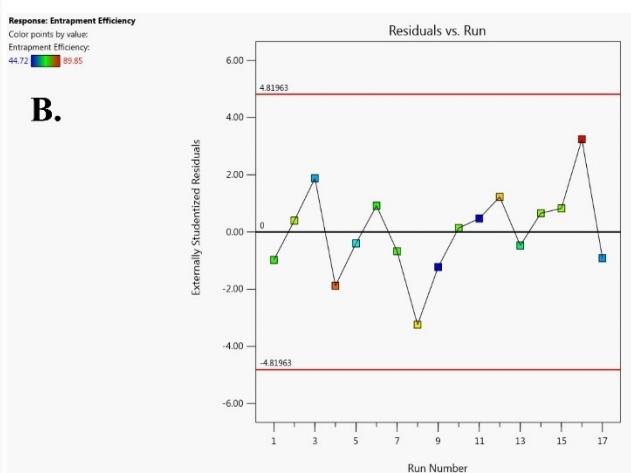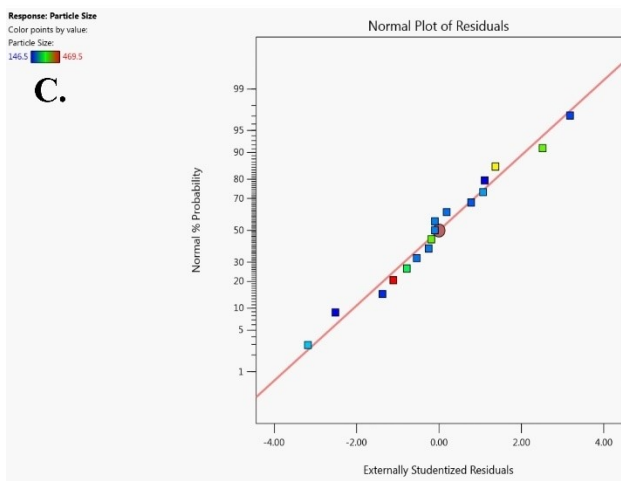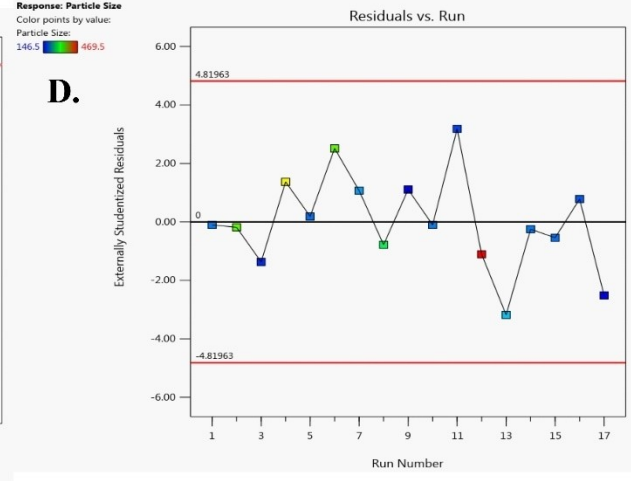

**Fig S3.** Model of diagnosis plots for responses  $Y_1$  (A-B) and  $Y_2$  (C-D)

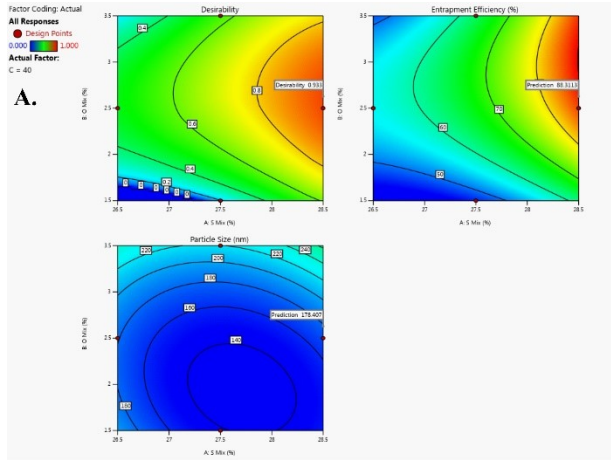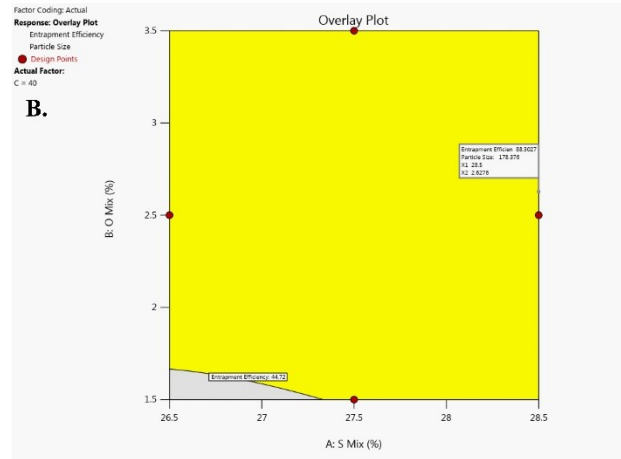

**Fig S4.** Plots of **A)** Numerical optimization and **B)** Graphical optimization

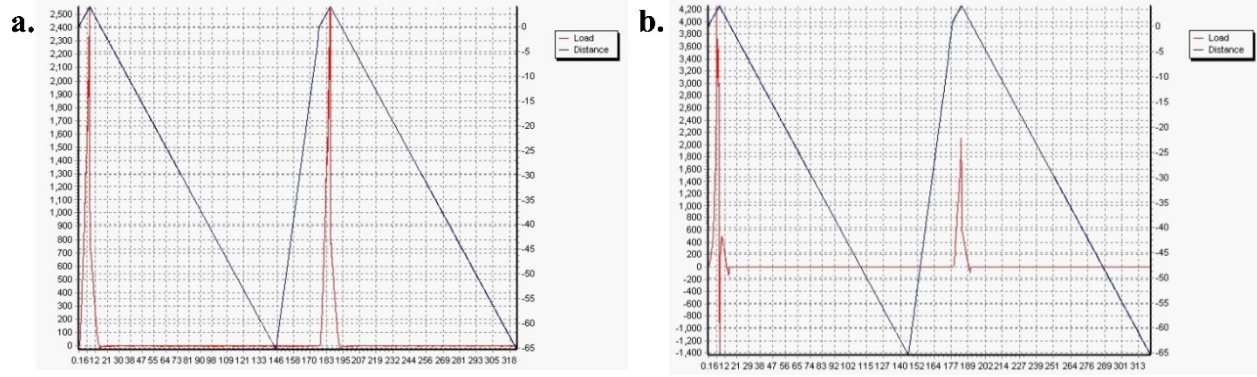

**Fig S5.** Texture analysis **a)** ABZ NLC-based gel and **b)** ABZ conventional gel

**Table S1.** ANOVA results for responses  $Y_1$  and  $Y_2$ 

| Source    | Response $Y_1$ |               |          |          | Response $Y_2$ |                |         |          |
|-----------|----------------|---------------|----------|----------|----------------|----------------|---------|----------|
|           | Coeff.         | Sum of Square | F- value | p-value  | Coeff.         | Sum of squares | F-value | p-value  |
| Model     | +72.02         | 1.464         | 192.41   | < 0.0001 | +188.20        | 16262.95       | 192.41  | < 0.0001 |
| $X_1$     | +13.08         | 1369.21       | 172.34   | < 0.0001 | +98.68         | 77894.04       | 921.56  | < 0.0001 |
| $X_2$     | +5.69          | 258.78        | 32.57    | 0.0007   | +11.19         | 1001.28        | 11.85   | 0.0108   |
| $X_3$     | -3.56          | 101.53        | 12.78    | 0.0090   | -67.84         | 36815.41       | 435.56  | < 0.0001 |
| $X_1X_2$  | +4.47          | 80.10         | 10.08    | 0.0156   | +15.85         | 1004.89        | 11.89   | 0.0107   |
| $X_1X_3$  | -4.75          | 90.25         | 11.36    | 0.0119   | -59.75         | 14280.25       | 168.95  | < 0.0001 |
| $X_2X_3$  | +9.55          | 364.81        | 45.92    | 0.0003   | -16.43         | 1079.12        | 12.77   | 0.0091   |
| $X_1^2$   | -12.16         | 622.08        | 78.30    | < 0.0001 | +37.96         | 6068.01        | 71.79   | < 0.0001 |
| $X_2^2$   | +4.76          | 95.40         | 12.01    | 0.0105   | +33.59         | 4749.98        | 56.20   | 0.0001   |
| $X_3^2$   | -1.58          | 10.51         | 1.32     | 0.2878   | +22.09         | 2054.14        | 24.30   | 0.0017   |
| Residual  |                | 55.61         |          |          |                | 591.67         |         |          |
| Cor Total |                | 3030.85       |          |          |                | 1.470          |         |          |
